# Supplementary material
Source: PubMed Central journal article supplement (PMC5001144)
Supplement: DC160181SupplementaryData.pdf [file DC160181SupplementaryData.pdf]

SUPPLEMENTARY DATA

**Supplementary Table 1. Distribution and association of factors related to autoimmune reversion by number of autoantibodies previously expressed at any time point during the follow-up**

|                                                    | Single, GADA       |                              |                                    | Single, IAA        |                              |                                    | Single, IA2A       | Two Abs*                  | Three Abs*               |
|----------------------------------------------------|--------------------|------------------------------|------------------------------------|--------------------|------------------------------|------------------------------------|--------------------|---------------------------|--------------------------|
|                                                    | Total N (% Revert) | Months to Reversion (median) | Multivariate HR (95%CI) (* p<0.05) | Total N (% Revert) | Months to Reversion (median) | Multivariate HR (95%CI) (* p<0.05) | Total N (% Revert) | Total N (% Both Reverted) | Total N (% All Reverted) |
| <b>Overall</b>                                     | 45/242 (18.6)      | 8.8                          |                                    | 72/245 (29.4)      | 10.1                         |                                    | 1/13 (7.7)         | 4/338 (1.2)               | 1/210 (0.5)              |
| <b>HLA-DR genotype</b>                             |                    |                              |                                    |                    |                              |                                    |                    |                           |                          |
| DR3/4                                              | 17/122 (13.9)      | 8.8                          | ref                                | 29/124 (23.4)      | 9.9                          | ref                                | 0/4 (0)            | 2/198 (0.1)               | 1/121 (0.8)              |
| DR4/4                                              | 10/39 (25.6)       | 6.0                          | 1.52 (0.67 - 3.48)                 | 13/42 (31.0)       | 6.5                          | 1.62 (0.77 - 3.40)                 | 1/4 (25.0)         | 0/54 (0)                  | 0/46 (0)                 |
| DR4/8                                              | 7/24 (29.2)        | 12.0                         | 1.52 (0.60 - 3.84)                 | 17/52 (32.7)       | 13.3                         | 1.05 (0.55 - 2.01)                 | 0/3 (0)            | 2/45 (4.0)                | 0/27 (0)                 |
| DR3/3                                              | 10/54 (18.5)       | 8.4                          | 1.15 (0.51 - 2.63)                 | 9/14 (64.3)        | 11.8                         | <b>2.67 (1.14 - 6.24)</b>          | 0/1 (0)            | 0/25 (0)                  | 0/6 (0)                  |
| FDR specific**                                     | 1/3 (1.0)          | 14.6                         | 3.04 (0.26 - 36.2)                 | 4/13 (30.8)        | 12.3                         | 3.39 (0.87 - 13.2)                 | 0/1 (0)            | 0/16 (0)                  | 0/10 (0)                 |
| <b>First Degree Relative</b>                       |                    |                              |                                    |                    |                              |                                    |                    |                           |                          |
| No                                                 | 41/196 (20.9)      | 8.8                          | ref                                | 61/191 (31.9)      | 10.0                         | ref                                | 1/10 (10.0)        | 4/256 (1.6)               | 1/160 (0)                |
| Yes                                                | 4/46 (8.7)         | 11.8                         | 0.55 (0.16 - 1.92)                 | 11/54 (20.4)       | 11.8                         | 0.63 (0.28 - 1.41)                 | 0/3 (0)            | 0/82 (0)                  | 0/50 (0)                 |
| <b>Country of Residence</b>                        |                    |                              |                                    |                    |                              |                                    |                    |                           |                          |
| US                                                 | 18/95 (18.9)       | 11.4                         | ref                                | 21/69 (30.4)       | 8.6                          | ref                                | 0/3 (0)            | 1/109 (0.9)               | 0/68 (0)                 |
| Finland                                            | 7/47 (14.9)        | 12.0                         | 1.87 (0.66 - 5.30)                 | 21/79 (26.6)       | 9.3                          | 0.81 (0.40 - 1.62)                 | 1/2 (50.0)         | 1/91 (1.1)                | 0/63 (0)                 |
| Germany                                            | 1/10 (10.0)        | 12.0                         | 0.69 (0.09 - 5.51)                 | 4/18 (22.2)        | 18.8                         | 1.33 (0.37 - 4.74)                 | 0/2 (0)            | 0/27 (0)                  | 0/13 (0)                 |
| Sweden                                             | 19/90 (21.1)       | 6.0                          | 1.42 (0.69 - 2.92)                 | 26/79 (32.9)       | 12.9                         | 0.82 (0.44 - 1.53)                 | 0/6 (0)            | 2/111 (1.8)               | 1/66 (0)                 |
| <b>Gender</b>                                      |                    |                              |                                    |                    |                              |                                    |                    |                           |                          |
| Male                                               | 22/132 (16.7)      | 7.5                          | ref                                | 39/142 (27.5)      | 9.3                          | ref                                | 1/11 (9.1)         | 1/194 (0.5)               | 1/123 (0)                |
| Female                                             | 23/110 (20.9)      | 9.4                          | 1.45 (0.76 - 2.74)                 | 33/103 (32.0)      | 11.6                         | 0.83 (0.47 - 1.46)                 | 0/2 (0)            | 3/144 (2.1)               | 0/87 (0)                 |
| <b>Age at Seroconversion (months)</b>              |                    |                              |                                    |                    |                              |                                    |                    |                           |                          |
| ≤12                                                | 10/20 (50.0)       | 6.7                          | ref                                | 18/71 (25.4)       | 9.5                          | ref                                | 0.0 (0)            | 0(0)                      | 0(0)                     |
| >12 and ≤24                                        | 10/44 (22.7)       | 11.6                         | <b>0.51 (0.20 - 1.31)</b>          | 21/76 (27.6)       | 12.1                         | 0.82 (0.40 - 1.69)                 | 1/1 (100)          | 0/97 (0)                  | 1/42 (2.4)               |
| >24 and ≤48                                        | 19/88 (21.6)       | 8.8                          | <b>0.24 (0.10 - 0.59)*</b>         | 25/70 (35.7)       | 9.6                          | 0.68 (0.35 - 1.34)                 | 0/4 (0)            | 3/134 (2.2)               | 0/95 (0)                 |
| >48                                                | 6/90 (6.0)         | 10.7                         | <b>0.07 (0.02 - 0.21)*</b>         | 8/28 (28.6)        | 8.4                          | 0.60 (0.24 - 1.48)                 | 0/8 (0)            | 1/107 (0.9)               | 0/73 (0)                 |
| <b>Ab level at baseline (SD)</b>                   |                    |                              |                                    |                    |                              |                                    |                    | GADA: IAA: IA2A           | GADA: IAA: IA2A          |
| positive (0 - <1 SD)                               | 35/170 (20.6)      | 9.0                          | ref                                | 45/162 (27.8)      | 10.0                         | ref                                | 1/9 (11.1)         | 2/157: 2/222: 1/51        | 1/119: 1/156: 0/94       |
| positive (≥1 to 3 SD)                              | 9/49 (18.4)        | 6.2                          | 0.44 (0.19 - 1.00)                 | 18/55 (32.7)       | 11.8                         | 0.70 (0.38 - 1.29)                 | 0/2 (0)            | 0/72: 0/46: 0/27          | 0/60: 0/34: 1/60         |
| positive (≥3 SD)                                   | 1/23 (4.3)         | 5.5                          | 0.14 (0.02 - 1.07)                 | 9/28 (32.1)        | 9.3                          | <b>0.32 (0.13 - 0.79)*</b>         | 0/2 (0)            | 0/47: 0/25: 1/30          | 0/31: 0/20: 0/56         |
| <b>Ab level from baseline to persistent sample</b> |                    |                              |                                    |                    |                              |                                    |                    |                           |                          |
| Decrease                                           | 30/71 (42.3)       | 6.7                          | ref                                | 41/83 (49.4)       | 7.8                          | ref                                | 0/1 (0)            | 0/60: 4/89: 2/28          | 0/52: 0/52: 0/32         |
| Increase                                           | 15/171 (8.8)       | 10.1                         | <b>0.18 (0.09 - 0.35)*</b>         | 31/162 (19.1)      | 12.1                         | <b>0.32 (0.19 - 0.56)*</b>         | 1/12 (8.3)         | 2/215: 0/202: 0/80        | 1/158: 1/158: 1/174      |

\*Not mutually exclusive – children with two Abs who later developed a third are included in three Absoverall total N.

\*\*First degree relative (FDR) Specific HLA-DR includes DR3/9, DR4/1, DR4/4b, DR4/9, and DR4/13 (8).

Ab=autoantibody

## **The Teddy Study Group**

**Colorado Clinical Center:** Marian Rewers, M.D., Ph.D., PI<sup>1,4,5,6,10,11</sup>, Kimberly Bautista<sup>12</sup>, Judith Baxter<sup>9,10,12,15</sup>, Ruth Bedoy<sup>2</sup>, Daniel Felipe-Morales, Brigitte I. Frohnert, M.D.<sup>2,14</sup>, Patricia Gesualdo<sup>2,6,12,14,15</sup>, Michelle Hoffman<sup>12,13,14</sup>, Rachel Karban<sup>12</sup>, Edwin Liu, M.D.<sup>13</sup>, Jill Norris, Ph.D.<sup>2,3,12</sup>, Adela Samper-Imaz, Andrea Steck, M.D.<sup>3,14</sup>, Kathleen Waugh<sup>6,7,12,15</sup>, Hali Wright<sup>12</sup>. University of Colorado, Anschutz Medical Campus, Barbara Davis Center for Childhood Diabetes.

**Georgia/Florida Clinical Center:** Jin-Xiong She, Ph.D., PI<sup>1,3,4,11</sup>, Desmond Schatz, M.D.\*<sup>4,5,7,8</sup>, Diane Hopkins<sup>12</sup>, Leigh Steed<sup>12,13,14,15</sup>, Jamie Thomas\*<sup>6,12</sup>, Janey Adams\*<sup>12</sup>, Katherine Silvis<sup>2</sup>, Michael Haller, M.D.\*<sup>14</sup>, Melissa Gardiner, Richard McIndoe, Ph.D., Ashok Sharma, Joshua Williams, Gabriela Foghis, Stephen W. Anderson, M.D.<sup>^</sup>, Richard Robinson, Laura Jacobsen, M.D.\*<sup>14</sup>. Center for Biotechnology and Genomic Medicine, Georgia Regents University. \*University of Florida, ^Pediatric Endocrine Associates, Atlanta.

**Germany Clinical Center:** Anette G. Ziegler, M.D., PI<sup>1,3,4,11</sup>, Andreas Beyerlein, Ph.D.<sup>2</sup>, Ezio Bonifacio Ph.D.\*<sup>5</sup>, Michael Hummel, M.D.<sup>13</sup>, Sandra Hummel, Ph.D.<sup>2</sup>, Kristina Foterek<sup>¥2</sup>, Nicole Janz, Mathilde Kersting, Ph.D.<sup>¥2</sup>, Annette Knopff<sup>7</sup>, Sibylle Koletzko, M.D.<sup>¶13</sup>, Claudia Peplow<sup>12</sup>, Roswith Roth, Ph.D.<sup>9</sup>, Marlon Scholz, Joanna Stock<sup>9,12</sup>, Elisabeth Strauss<sup>12,14</sup>, Katharina Warncke, M.D.<sup>14</sup>, Lorena Wendel, Christiane Winkler, Ph.D.<sup>2,12,15</sup>. Forschergruppe Diabetes e.V. and Institute of Diabetes Research, Helmholtz Zentrum München, and Klinikum rechts der Isar, Technische Universität München. \*Center for Regenerative Therapies, TU Dresden, ¶Dr. von Hauner Children's Hospital, Department of Gastroenterology, Ludwig Maximilians University Munich, ¥Research Institute for Child Nutrition, Dortmund.

**Finland Clinical Center:** Jorma Toppari, M.D., Ph.D., PI<sup>¥^1,4,11,14</sup>, Olli G. Simell, M.D., Ph.D.<sup>¥^1,4,11,13</sup>, Annika Adamsson, Ph.D.<sup>^12</sup>, Heikki Hyöty, M.D., Ph.D.\*<sup>±6</sup>, Jorma Ilonen, M.D., Ph.D.<sup>¥ ¶13</sup>, Sanna Jokipuu<sup>^</sup>, Tiina Kallio<sup>^</sup>, Miia Kähönen<sup>μ±</sup>, Mikael Knip, M.D., Ph.D.\*<sup>±5</sup>, Annika Koivu<sup>¥^</sup>, Mirva Koreasalo\*<sup>±§2</sup>, Kalle Kurppa, M.D., Ph.D.\*<sup>±13</sup>, Maria Lönnrot, M.D., Ph.D.\*<sup>±6</sup>, Elina Mäntymäki<sup>¥^</sup>, Katja Multasuo<sup>μ±</sup>, Juha Mykkänen, Ph.D.<sup>^¥ 3</sup>, Tiina Niininen<sup>±\*12</sup>, Mia Nyblom\*<sup>±</sup>, Petra Rajala<sup>^</sup>, Jenna Rautanen<sup>±§</sup>, Anne Riikonen\*<sup>±</sup>, Minna Romo<sup>¥^</sup>, Satu Simell, M.D., Ph.D.<sup>^±13</sup>, Tuula Simell, Ph.D., Ville Simell<sup>^¥13</sup>, Maija Sjöberg<sup>¥^12,14</sup>, Aino Stenius<sup>μ±12</sup>, Maria Särnä<sup>^</sup>, Sini Vainionpää<sup>^</sup>, Eeva Varjonen<sup>¥^12</sup>, Riitta Veijola, M.D., Ph.D.<sup>μ±14</sup>, Suvi M. Virtanen, M.D., Ph.D.\*<sup>±§2</sup>, Mari Vähä-Mäkilä<sup>^</sup>, Mari Åkerlund\*<sup>±§</sup>, Katri Lindfors, Ph.D.\*<sup>13</sup> ¥University of Turku, \*University of Tampere, μUniversity of Oulu, ^Turku University Hospital, Hospital District of Southwest Finland, ±Tampere University Hospital, ¶Oulu University Hospital, §National Institute for Health and Welfare, Finland, ¶University of Kuopio.

## SUPPLEMENTARY DATA

**Sweden Clinical Center:** Åke Lernmark, Ph.D., PI<sup>1,3,4,5,6,8,10,11,15</sup>, Daniel Agardh, M.D., Ph.D.<sup>13</sup>, Carin Andrén Aronsson<sup>2,13</sup>, Maria Ask, Jenny Bremer, Ulla-Marie Carlsson, Corrado Cilio, Ph.D., M.D.<sup>5</sup>, Emelie Ericson-Hallström, Lina Fransson, Thomas Gard, Joanna Gerardsson, Rasmus Bennet, Monica Hansen, Gertie Hansson<sup>12</sup>, Cecilia Harmby, Susanne Hyberg, Fredrik Johansen, Berglind Jonasdottir M.D., Helena Elding Larsson M.D., Ph.D.<sup>6,14</sup>, Sigrid Lenrick Forss, Markus Lundgren<sup>14</sup>, Maria Månsson-Martinez, Maria Markan, Jessica Melin<sup>12</sup>, Zeliha Mestan, Kobra Rahmati, Anita Ramelius, Anna Rosenquist, Falastin Salami, Sara Sibthorpe, Birgitta Sjöberg, Ulrica Swartling, Ph.D.<sup>9,12</sup>, Evelyn Tekum Amboh, Carina Törn, Ph.D.<sup>3,15</sup>, Anne Wallin, Åsa Wimar<sup>12,14</sup>, Sofie Åberg. Lund University.

**Washington Clinical Center:** William A. Hagopian, M.D., Ph.D., PI<sup>1,3,4, 5, 6,7,11,13, 14</sup>, Michael Killian<sup>6,7,12,13</sup>, Claire Cowen Crouch<sup>12,14,15</sup>, Jennifer Skidmore<sup>2</sup>, Stephen Ayres, Kayleen Dunson, Rachel Hervey, Corbin Johnson, Rachel Lyons, Arlene Meyer, Denise Mulenga, Elizabeth Scott, Joshua Stabbert, Alexander Tarr, Morgan Uland, John Willis. Pacific Northwest Diabetes Research Institute.

**Pennsylvania Satellite Center:** Dorothy Becker, M.D., Margaret Franciscus, MaryEllen Dalmagro-Elias Smith<sup>2</sup>, Ashi Daftary, M.D., Mary Beth Klein, Chrystal Yates. Children's Hospital of Pittsburgh of UPMC.

**Data Coordinating Center:** Jeffrey P. Krischer, Ph.D., PI<sup>1,4,5,10,11</sup>, Michael Abbondandolo, Sarah Austin-Gonzalez, Sandra Baethke, Rasheedah Brown<sup>12,15</sup>, Brant Burkhardt, Ph.D.<sup>5,6</sup>, Martha Butterworth<sup>2</sup>, Joanna Clasen, David Cuthbertson, Christopher Eberhard, Steven Fiske<sup>9</sup>, Dena Garcia, Jennifer Garmeson, Veena Gowda, Kathleen Heyman, Francisco Perez Laras, Hye-Seung Lee, Ph.D.<sup>1,2,13,15</sup>, Shu Liu, Xiang Liu, Ph.D.<sup>2,3,9,14</sup>, Kristian Lynch, Ph.D.<sup>5,6,9,15</sup>, Jamie Malloy, Cristina McCarthy<sup>12,15</sup>, Wendy McLeod, Steven Meulemans, Hemang Parikh, Ph.D.<sup>3</sup>, Chris Shaffer, Laura Smith, Ph.D.<sup>9,12</sup>, Susan Smith<sup>12,15</sup>, Noah Sulman, Ph.D., Roy Tamura, Ph.D.<sup>1,2,13</sup>, Ulla Uusitalo, Ph.D.<sup>2,15</sup>, Kendra Vehik, Ph.D.<sup>4,5,6,14,15</sup>, Ponni Vijayakandipan, Keith Wood, Jimin Yang, Ph.D., R.D.<sup>2,15</sup>. *Past staff:* Lori Ballard, David Hadley, Ph.D. University of South Florida.

**Project scientist:** Beena Akolkar, Ph.D.<sup>1,3,4,5, 6,7,10,11</sup>. National Institutes of Diabetes and Digestive and Kidney Diseases.

**Other contributors:** Kasia Bourcier, Ph.D.<sup>5</sup>, National Institutes of Allergy and Infectious Diseases. Thomas Briese, Ph.D.<sup>6,15</sup>, Columbia University. Suzanne Bennett Johnson, Ph.D.<sup>9,12</sup>, Florida State University. Eric Triplett, Ph.D.<sup>6</sup>, University of Florida.

## SUPPLEMENTARY DATA

**Autoantibody Reference Laboratories:** Liping Yu, M.D.<sup>^5</sup>, Dongmei Miao, M.D.<sup>^</sup>, Polly Bingley, M.D., FRCP<sup>\*5</sup>, Alistair Williams<sup>\*</sup>, Kyla Chandler<sup>\*</sup>, Saba Rokni<sup>\*</sup>, Claire Caygill<sup>\*</sup>, Claire Williams<sup>\*</sup>, Rebecca Wyatt<sup>\*</sup>, Gifty George<sup>\*</sup>, Sian Grace<sup>\*</sup>. <sup>^</sup>Barbara Davis Center for Childhood Diabetes, University of Colorado Denver, <sup>\*</sup>School of Clinical Sciences, University of Bristol UK.

**HLA Reference Laboratory:** Henry Erlich, Ph.D.<sup>3</sup>, Steven J. Mack, Ph.D., Anna Lisa Fear. Center for Genetics, Children's Hospital Oakland Research Institute.

**Repository:** Heather Higgins, Sandra Ke. NIDDK Biosample Repository at Fisher BioServices.

### ***Committees:***

<sup>1</sup>Ancillary Studies, <sup>2</sup>Diet, <sup>3</sup>Genetics, <sup>4</sup>Human Subjects/Publicity/Publications, <sup>5</sup>Immune Markers, <sup>6</sup>Infectious Agents, <sup>7</sup>Laboratory Implementation, <sup>8</sup>Maternal Studies, <sup>9</sup>Psychosocial, <sup>10</sup>Quality Assurance, <sup>11</sup>Steering, <sup>12</sup>Study Coordinators, <sup>13</sup>Celiac Disease, <sup>14</sup>Clinical Implementation, <sup>15</sup>Quality Assurance Subcommittee on Data Quality.
